# Supplementary material
Source: Springer Nature journal article supplement (https://www.springermedizin.de/resource/supplementary/12885_2013_4644_MOESM1_ESM.pdf/9466938)
Supplement: MOESM1 [file 9466938]

Eligible Patients = 796

Missed = 116 (15%)

*The most common reasons for missing eligible patients were research nurse sickness or holiday.*

Declined to participate = 225 (28%)

*Common reasons for declining included having too much on their mind, not wanting to do questionnaires, or not wishing to participate in research studies.*

Consented patients = 455 (57%)
